# Supplementary material for: Expression of HDACs 1, 3 and 8 Is Upregulated in the Presence of Infiltrating Lymphocytes in Uveal Melanoma
Source: MDPI journal article supplement (doi:10.3390/cancers13164146), 2021-08-18

Supplementary Table S1. Correlation between mRNA expression levels (determined by Illumina array) of different HDACs and expression of BAP1 in the TCGA cohort (n=80). R = two-tailed Spearman correlation coefficient.  $P \leq 0.05$  is considered significant, and indicated in bold

|               | <b>BAP1</b> |                  |
|---------------|-------------|------------------|
|               | <b>R</b>    | <b>P</b>         |
| <b>HDAC1</b>  | -.201       | .07              |
| <b>HDAC2</b>  | -.010       | .93              |
| <b>HDAC3</b>  | -.268       | <b>.02</b>       |
| <b>HDAC4</b>  | -.625       | <b>&lt;0.001</b> |
| <b>HDAC6</b>  | .427        | <b>&lt;0.001</b> |
| <b>HDAC7</b>  | -.022       | .84              |
| <b>HDAC8</b>  | -.560       | <b>&lt;0.001</b> |
| <b>HDAC9</b>  | -.069       | -.069            |
| <b>HDAC11</b> | .739        | <b>&lt;0.001</b> |

Supplementary Table S2. Correlation between mRNA expression levels (determined by Illumina array) of different HDACs and T cell fraction (%) as determined by ddPCR (n=59). R = two-tailed Spearman correlation coefficient.  $P \leq 0.05$  is considered significant, and indicated in bold

| T cell fraction |          |             |
|-----------------|----------|-------------|
|                 | <b>R</b> | <b>P</b>    |
| <b>HDAC1</b>    | .399     | <b>.002</b> |
| <b>HDAC2</b>    | -.232    | .08         |
| <b>HDAC3</b>    | .319     | <b>.01</b>  |
| <b>HDAC4</b>    | .200     | .13         |
| <b>HDAC6</b>    | -.314    | <b>.02</b>  |
| <b>HDAC7</b>    | .183     | .16         |
| <b>HDAC8</b>    | .357     | <b>.01</b>  |
| <b>HDAC9</b>    | -.122    | .36         |
| <b>HDAC11</b>   | -.363    | <b>.005</b> |

Supplementary Figure S1: Influence of adding IFN $\gamma$  on HLA-A and HLA-B mRNA expression on cultured UM cell lines.

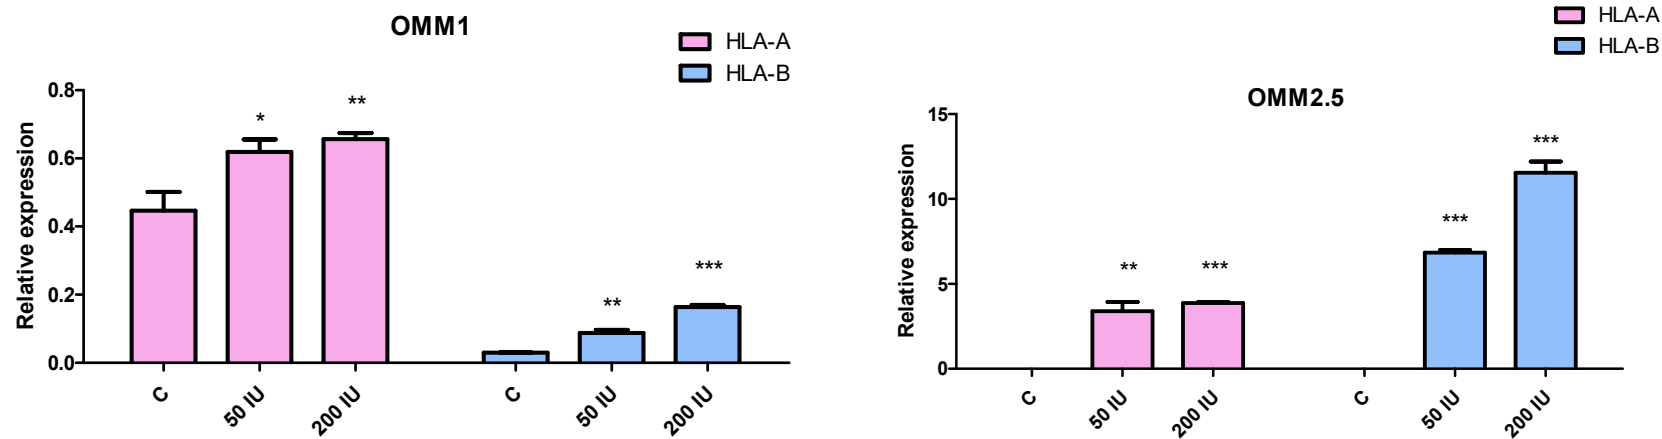

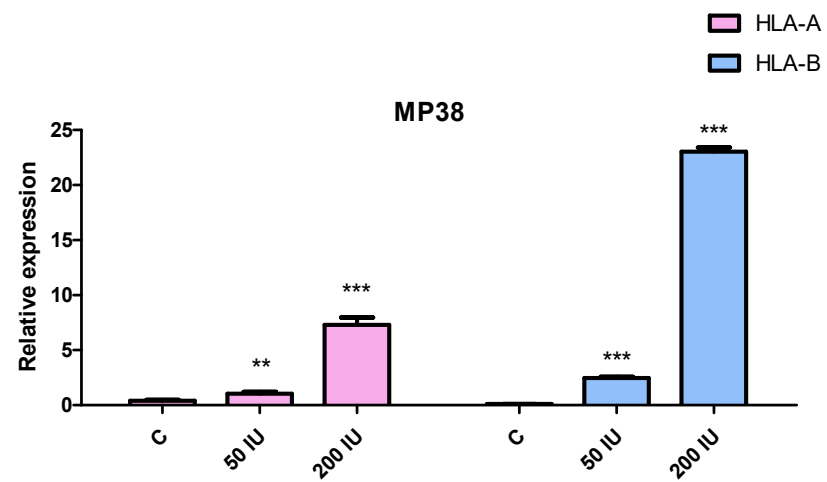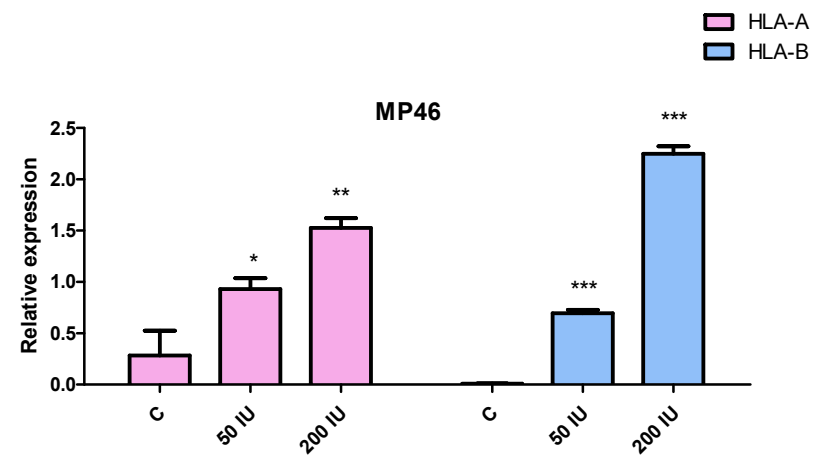

Supplement: s1 [file s1]
